# Supplementary material
Source: ML conference proceedings conference paper supplement (https://openaccess.thecvf.com/content/WACV2023/html/Pimpalkhute_GEMS_Generating_Efficient_WACV_2023_paper.html)
Supplement: Supplementary file 1 [file Pimpalkhute_GEMS_Generating_Efficient_WACV_2023_supplemental.pdf]

# Supplementary for GEMS: Generating Efficient Meta-Subnets

Varad Pimpalkhute  
TCS Research,  
Mumbai, India  
varad.p@tcs.com

Shruti Kunde  
TCS Research,  
Mumbai, India  
shruti.kunde@tcs.com

Rekha Singhal  
TCS Research,  
Mumbai, India  
rekha.singhal@tcs.com

## A. Experimental Setup

All experiments are conducted in isolation on a dedicated MIG A100 GPU setup, with 30 GB RAM, 8vCPUS and 10GB GPU memory. For each experiment we record the model accuracy and time required for training. Each experiment has been repeated 3 times with different seeds to ensure sufficient randomness.

### A.1. Architecture Details

The model architecture is similar to the original MAML [2] paper, i.e., 4 modules with 3 x 3 convolutions and 64 filters with a stride of 2, followed by batch normalization, a ReLU nonlinearity and 2 x 2 max-pooling. The MLP is a fully connected network, where each layer consists of 2N hidden units, where N is the number of layers of the base learner network. The ReLU activation function is placed between the MLP layers.

### A.2. Dataset Details

We have used 4 quasi-benchmark datasets (CuBirds, VGGFlowers, Aircraft, Fungi) from the field of meta-learning for our experimentation purpose. The CU-Birds dataset contains 11,788 images of 200 bird species. The data is split into 200 classes that are divided into 100, 50 and 50 for meta-training, meta-validation and meta-testing respectively. VGGFlower is a dataset consisting of 102 flower categories. Each class consists between 40-258 images. The aircraft dataset contains 10,200 images. There are 100 images for each of the 102 aircraft model variants. The data is divided into 3 equally-sized training, validation and test subsets. The Fungi dataset contains 1394 species of fungi. It has 85578 training images, 4182 validation images and 9758 testing images. The table below provides a detailed list of hyper-parameters that were used when setting up the experiments.

### A.3. Training Details

The default setting for adaption steps is 5 and fast LR is 0.01. We use 0.5 as the random initialization for sparsity in the MMSUP experiments and the value for sparsity

is learned during training. These settings are used in our experiment setup for comparing performance of MMSUP and BMP to MAML (base line) and Multi-MAML. The varying sparsity, inner loop learning rate and adaptation steps values depicted in Table 1 are used for setting up experiments conducted as a part of ablation studies outline in the main paper.

Table 1. Experiment setup parameters

| Parameter        | Value                        |
|------------------|------------------------------|
| Iterations       | 30000                        |
| Meta-batch size  | 5                            |
| Shots            | 1                            |
| Ways             | 5                            |
| Adaptation steps | 1,2,3,4,5                    |
| Fast LR          | 0.1, 0.5, 0.05, 0.001, 0.005 |
| Meta-LR          | 0.0001                       |
| Random seeds     | 21, 42, 56                   |
| Sparsity%        | 10, 20, ..., 90              |

## B. Additional Results

Table 2 depicts a snapshot of additional combinations of datasets on which we tested performance of BMP and MM-SUP.

## C. Analysis of GEMS

### C.1. Analysis of convergence of MMSUP

In this section, we will study whether there is any positive learning in the network after each training iteration. We want to prove that

$$\mathcal{L}_{n+1} < \mathcal{L}_n$$

where, n is the current training iteration.

Let us consider a neuron whose weights are getting masked or unmasked after every iteration. Masking depends on the sparsity value of the layer, i.e., if sparsity is k, then top k weights will be fed to the neuron. Consider two weights –  $W_i$  and  $W_j$ . In  $n^{th}$  iteration,  $W_j$  is fed as input to the neuron whereas  $W_i$  is masked. While, in the  $n + 1^{th}$  iteration,  $W_i$  is fed as input to the neuron whereas  $W_j$  is masked. This signifies that,

Table 2. 5ways, 1 shot

| Train Dist           | Test Dist | Meta-learning Architectures |      |            |       |          |       |          |       |
|----------------------|-----------|-----------------------------|------|------------|-------|----------|-------|----------|-------|
|                      |           | MAML                        |      | Multi-MAML |       | BMP      |       | MMSUP    |       |
|                      |           | Accuracy                    | Time | Accuracy   | Time  | Accuracy | Time  | Accuracy | Time  |
| CUB200<br>+ Aircraft | CUB       | 0.468                       | 7.07 | 0.533      | 15.51 | 0.528    | 12.13 | 0.545    | 8.76  |
|                      | Aircraft  | 0.309                       |      | 0.399      |       | 0.428    |       | 0.397    |       |
| VGG102<br>+ Aircraft | VGG102    | 0.656                       | 7.05 | 0.728      | 14.92 | 0.738    | 12.09 | 0.722    | 8.2   |
|                      | Aircraft  | 0.342                       |      | 0.399      |       | 0.448    |       | 0.414    |       |
| Fungi<br>+ Aircraft  | Fungi     | 0.372                       | 8.6  | 0.424      | 16.92 | 0.437    | 13.7  | 0.393    | 14.31 |
|                      | Aircraft  | 0.324                       |      | 0.399      |       | 0.438    |       | 0.427    |       |

$$\bar{W}_i - W_i > \bar{W}_j - W_j$$

Thus, during backpropagation, we can say that the value of gradients of  $W_i$  is greater than that of  $W_j$ , which bring us to the following equation:

$$-\frac{\delta \mathcal{L}}{\delta I_p} W_i Z_i > -\frac{\delta \mathcal{L}}{\delta I_p} W_j Z_j \quad (1)$$

where,  $I_p$  is the input and  $Z_i$  is the activation function for the  $i^{th}$  weight. Hence, after swapping the weights / edges of the neural network, the equation of the input  $I_p$  changes from

$$I_p = \sum W_k Z_k + W_i Z_i$$

to

$$\bar{I}_p = \sum W_k Z_k + W_j Z_j$$

Hence, change in the input is given by:

$$\bar{I}_p - I_p = W_j Z_j - W_i Z_i \quad (2)$$

We now compute the change in the loss from iteration  $n$  to iteration  $n + 1$ .

$$\mathcal{L}(\bar{I}_p) = \mathcal{L}(I_p + (\bar{I}_p - I_p))$$

Expanding the Taylor's series and approximating it, we get,

$$\mathcal{L}(\bar{I}_p) = \mathcal{L}(I_p) + \frac{\delta \mathcal{L}}{\delta I_p} (\bar{I}_p - I_p)$$

Thus, substituting Equation 2 in the above equation, we get,

$$\mathcal{L}(\bar{I}_p) = \mathcal{L}(I_p) + \frac{\delta \mathcal{L}}{\delta I_p} (W_j Z_j - W_i Z_i) \quad (3)$$

From Equation 1 and Equation 3, we conclude that,  $\mathcal{L}(\bar{I}_p) < \mathcal{L}(I_p)$ . We can henceforth conclude that as the network learns on the subnetwork, it also converges towards the global minima.

## D. Resources

The results reported in the paper are produced using open source and free software. We build up on learn2learn<sup>1</sup> [1] to make

<sup>1</sup>learn2learn is an open-source PyTorch library for meta-learning research <https://github.com/learnables/learn2learn>.

custom modules for BMP and MMSUP keeping in spirits with the PyTorch [9] framework. We also made use of Numpy [4] and Pandas [7] libraries for building custom few-shot learning dataset modules and sparsity in the network using lottery ticket hypothesis. All plots were generated using Matplotlib [5].

All the final experiments were run in a Linux environment. For producing and debugging, we made use of Google Colab Pro that also ran on a Linux environment. The datasets were hand-picked from public domain datasets allowing usage for research purposes. cub200 We made use of CUBirds [10], VGGFlowers [8], FGVC Aircraft [6] and FGVC Fungi [3] datasets.

## E. PyTorch Code Snippets

In this section, we walkthrough some of the important modules required for implementation of BMP and MMSUP approaches. We present pseudo codes on how to reproduce the algorithms in PyTorch.

```

1 class BinaryMask(torch.autograd.Function):
2     def __init__(self):
3         super(BinaryMask, self).__init__()
4
5     @staticmethod
6     def forward(ctx, input):
7         # Compute Binary mask --
8         # 1: Values greater than zero
9         # 0: Values less than or equal to zero
10
11    @staticmethod
12    def backward(ctx, grad):
13        # Return grad without computing gradients
14        # Straight Through Estimator (STE)

```

Code Listing 1. Binary Mask

```

1 # Number of adaptation steps
2 for step in range(adaptation_steps):
3     # Compute loss on input batch
4     train_error = loss(learner(data_batch),
5                          true_labels)
6     param_dict = # Get backbone parameters
7     # Compute gradients using training error and
8     param_dict
9     support_loss_grad = grad(train_error,
10                             param_dict.values(), retain_graph=True)
11     task_embedding = # Stack mean of weights and
12                     gradient per layer

```

```

9 layer_pred = regularizer(torch.mul(
10 task_embedding, inp_embedding))
11 # Use previously learned knowledge
12 # to compute binary mask
13 mask = BinaryMask.apply(layer_pred)
14 # Update weights of the backbone
15 learner.adapt(train_error, mask)

```

Code Listing 2. Inner Loop Optimization

```

1 class ComputeMask(torch.autograd.Function):
2     @staticmethod
3     def forward(ctx, params, sparsity):
4         # k is the sparsity of the layer
5         # 1: For top k parameters
6         # 0: Rest of the parameters
7
8     @staticmethod
9     def backward(ctx, g):
10        # Return gradient as it is
11

```

Code Listing 3. Generate Sparsity Mask

```

1 class SupermaskConv(nn.Conv2d):
2     def __init__(self, *args, **kwargs):
3         super().__init__(*args, **kwargs)
4         # Set an initialization (e.g., kaiming
5         normal)
6
7     def forward(self, x, sparsity):
8         self.scores = self.weight.detach()
9         # Compute a subnetwork from backbone
10        subnet = ComputeMask.apply(self.scores,
11        sparsity)
12        # Apply the mask on the network
13        w = self.weight * subnet
14        return F.conv2d(x, w, self.bias, self.
15        stride, self.padding, self.dilation, self.
16        groups)

```

Code Listing 4. Compute Sparse Network

- Array programming with NumPy. *Nature*, 585(7825):357–362, Sept. 2020.
- [5] J. D. Hunter. Matplotlib: A 2d graphics environment. *Computing in Science & Engineering*, 9(3):90–95, 2007.
  - [6] S. Maji, J. Kannala, E. Rahtu, M. Blaschko, and A. Vedaldi. Fine-grained visual classification of aircraft. Technical report, University of Massachusetts Amherst, 2013.
  - [7] Wes McKinney et al. Data structures for statistical computing in python. In *Proceedings of the 9th Python in Science Conference*, volume 445, pages 51–56. Austin, TX, 2010.
  - [8] Maria-Elena Nilsback and Andrew Zisserman. Automated flower classification over a large number of classes. In *2008 Sixth Indian Conference on Computer Vision, Graphics Image Processing*, pages 722–729, 2008.
  - [9] Adam Paszke, Sam Gross, Francisco Massa, Adam Lerer, James Bradbury, Gregory Chanan, Trevor Killeen, Zeming Lin, Natalia Gimelshein, Luca Antiga, Alban Desmaison, Andreas Kopf, Edward Yang, Zachary DeVito, Martin Raison, Alykhan Tejani, Sasank Chilamkurthy, Benoit Steiner, Lu Fang, Junjie Bai, and Soumith Chintala. Pytorch: An imperative style, high-performance deep learning library. In H. Wallach, H. Larochelle, A. Beygelzimer, F. d’Alché-Buc, E. Fox, and R. Garnett, editors, *Advances in Neural Information Processing Systems 32*, pages 8024–8035. Curran Associates, Inc., 2019.
  - [10] Catherine Wah, Steve Branson, Peter Welinder, Pietro Perona, and Serge J. Belongie. The caltech-ucsd birds-200-2011 dataset. In *Caltech-UCSD*, 2011.

## References

- [1] Sébastien M R Arnold, Praateek Mahajan, Debajyoti Datta, Ian Bunner, and Konstantinos Saitas Zarkias. learn2learn: A library for Meta-Learning research. Aug. 2020.
- [2] Chelsea Finn, Pieter Abbeel, and Sergey Levine. Model-agnostic meta-learning for fast adaptation of deep networks. *CoRR*, abs/1703.03400, 2017.
- [3] Tobias Guldberg Frøslev, Jacob Heilmann-Clausen, Christian Lange, Thomas Læssøe, Jens Henrik Petersen, Ulrik Søchting, Thomas Stjernegaard Jeppesen, and Jan Vestersholt. Danish mycological society, fungal records database, 2022.
- [4] Charles R. Harris, K. Jarrod Millman, Stéfan J. van der Walt, Ralf Gommers, Pauli Virtanen, David Cournapeau, Eric Wieser, Julian Taylor, Sebastian Berg, Nathaniel J. Smith, Robert Kern, Matti Picus, Stephan Hoyer, Marten H. van Kerkwijk, Matthew Brett, Allan Haldane, Jaime Fernández del Río, Mark Wiebe, Pearu Peterson, Pierre Gérard-Marchant, Kevin Sheppard, Tyler Reddy, Warren Weckesser, Hameer Abbasi, Christoph Gohlke, and Travis E. Oliphant.
